# Supplementary material for: Quantitative Synthesis of Factors Associated with COVID-19 Vaccine Acceptance and Vaccine Hesitancy in 185 Countries
Source: MDPI journal article supplement (doi:10.3390/vaccines12010034), 2023-12-28
Supplement: s1 [file s1]

### Supplementary material

**Table S1: Factors associated with COVID-19 vaccine acceptance that were selected and analyzed**

| Factors identified in the cross-sectional VA studies selected for our analysis                                                                                                                             | Factors grouped using the Health Belief Model (demographic, psychosocial, and structural variables) for further analysis in this study. |
|------------------------------------------------------------------------------------------------------------------------------------------------------------------------------------------------------------|-----------------------------------------------------------------------------------------------------------------------------------------|
| <ul style="list-style-type: none"> <li>• 18 – 30 years</li> <li>• 30 – 40 years</li> <li>• 40 – 50 years</li> <li>• 51 – 60 years</li> </ul>                                                               | Younger people                                                                                                                          |
| <ul style="list-style-type: none"> <li>• Above 60 years</li> </ul>                                                                                                                                         | Older people                                                                                                                            |
| <ul style="list-style-type: none"> <li>• Male</li> </ul>                                                                                                                                                   | Male                                                                                                                                    |
| <ul style="list-style-type: none"> <li>• Female</li> </ul>                                                                                                                                                 | Female                                                                                                                                  |
| <ul style="list-style-type: none"> <li>• Rural</li> </ul>                                                                                                                                                  | Rural                                                                                                                                   |
| <ul style="list-style-type: none"> <li>• Urban</li> </ul>                                                                                                                                                  | Urban                                                                                                                                   |
| <ul style="list-style-type: none"> <li>• No education</li> <li>• Primary education</li> <li>• Secondary education</li> </ul>                                                                               | Low education                                                                                                                           |
| <ul style="list-style-type: none"> <li>• Professional training</li> <li>• University level</li> <li>• Postgraduate level</li> </ul>                                                                        | High education                                                                                                                          |
| <ul style="list-style-type: none"> <li>• Smoker</li> </ul>                                                                                                                                                 | Smoker                                                                                                                                  |
| <ul style="list-style-type: none"> <li>• Non – smoker</li> </ul>                                                                                                                                           | Non – smoker                                                                                                                            |
| <ul style="list-style-type: none"> <li>• Self-protection</li> <li>• Protect others</li> </ul>                                                                                                              | Protection                                                                                                                              |
| <ul style="list-style-type: none"> <li>• Not married</li> <li>• Single</li> </ul>                                                                                                                          | Single                                                                                                                                  |
| <ul style="list-style-type: none"> <li>• Married</li> <li>• Living with spouse</li> </ul>                                                                                                                  | Married                                                                                                                                 |
| <ul style="list-style-type: none"> <li>• Living with children</li> <li>• Living with elderly</li> </ul>                                                                                                    | Living with relatives                                                                                                                   |
| <ul style="list-style-type: none"> <li>• Lower income</li> </ul>                                                                                                                                           | Lower income earner                                                                                                                     |
| <ul style="list-style-type: none"> <li>• Higher income</li> </ul>                                                                                                                                          | Higher income earner                                                                                                                    |
| <ul style="list-style-type: none"> <li>• Medical students</li> <li>• Nurses</li> <li>• Midwife</li> <li>• Laboratory technicians</li> <li>• Medical doctors</li> <li>• Community health workers</li> </ul> | Healthcare worker                                                                                                                       |
| <ul style="list-style-type: none"> <li>• Other vaccines for childhood</li> <li>• Other vaccines for adults</li> <li>• Influenza vaccine</li> </ul>                                                         | Influenza/Other vaccines                                                                                                                |
| <ul style="list-style-type: none"> <li>• student</li> </ul>                                                                                                                                                | Student                                                                                                                                 |
| <ul style="list-style-type: none"> <li>• private sector</li> </ul>                                                                                                                                         | Private sector                                                                                                                          |
| <ul style="list-style-type: none"> <li>• Christians</li> </ul>                                                                                                                                             | Christians                                                                                                                              |
| <ul style="list-style-type: none"> <li>• Muslims</li> </ul>                                                                                                                                                | Muslims                                                                                                                                 |
| <ul style="list-style-type: none"> <li>• No adverse effect</li> </ul>                                                                                                                                      | Safety                                                                                                                                  |

|                                                                                                                                                                                                                                                                                                                                  |                        |
|----------------------------------------------------------------------------------------------------------------------------------------------------------------------------------------------------------------------------------------------------------------------------------------------------------------------------------|------------------------|
| <ul style="list-style-type: none"> <li>• No side-effects</li> <li>• Safety</li> </ul>                                                                                                                                                                                                                                            |                        |
| <ul style="list-style-type: none"> <li>• High risk of infection</li> </ul>                                                                                                                                                                                                                                                       | High risk of infection |
| <ul style="list-style-type: none"> <li>• Effectiveness</li> <li>• Efficacy</li> <li>• Trust COVID-19 vaccines</li> <li>• Trust manufacturer</li> </ul>                                                                                                                                                                           | Effectiveness          |
| <ul style="list-style-type: none"> <li>• Scared of infection</li> <li>• Prior infection</li> <li>• Knows someone who has been infected</li> <li>• Tested positive for COVID-19</li> <li>• COVID-19 is dangerous and kills</li> <li>• Compliance with protective measure</li> </ul>                                               | Fear of infection      |
| <ul style="list-style-type: none"> <li>• Chronic disease</li> <li>• Poor health</li> <li>• Comorbidities</li> </ul>                                                                                                                                                                                                              | Comorbidities          |
| <ul style="list-style-type: none"> <li>• No previous infection</li> <li>• Good health</li> </ul>                                                                                                                                                                                                                                 | Good health            |
| <ul style="list-style-type: none"> <li>• Reliable information</li> <li>• social responsibility</li> <li>• Trust Ministry of Health</li> <li>• Trust government</li> <li>• Vaccine recommended by healthcare workers</li> <li>• Believe in community/public leaders</li> <li>• Trust</li> <li>• Vaccines are important</li> </ul> | Trust                  |
| <ul style="list-style-type: none"> <li>• Frequent traveller</li> </ul>                                                                                                                                                                                                                                                           | Frequent traveller     |
| <ul style="list-style-type: none"> <li>• Forced vaccination</li> <li>• Mandatory vaccination</li> <li>• Compulsory by employer</li> <li>• Compulsory by gov't</li> </ul>                                                                                                                                                         | Mandatory vaccination  |

**Table S2: Factors associated with COVID-19 vaccine hesitancy that were selected and analyzed in this study**

| Factors identified in V-H studies                                                                                                            | Factors grouped using the Health Belief Model (demographic, psychosocial, and structural variables) for further analysis in this study. |
|----------------------------------------------------------------------------------------------------------------------------------------------|-----------------------------------------------------------------------------------------------------------------------------------------|
| <ul style="list-style-type: none"> <li>• 18 – 30 years</li> <li>• 30 – 40 years</li> <li>• 40 – 50 years</li> <li>• 51 – 60 years</li> </ul> | Younger people                                                                                                                          |
| <ul style="list-style-type: none"> <li>• Above 60 years</li> </ul>                                                                           | Older people                                                                                                                            |
| <ul style="list-style-type: none"> <li>• Male</li> </ul>                                                                                     | Male                                                                                                                                    |
| <ul style="list-style-type: none"> <li>• Female</li> </ul>                                                                                   | Female                                                                                                                                  |
| <ul style="list-style-type: none"> <li>• transgender</li> </ul>                                                                              | Transgender                                                                                                                             |
| <ul style="list-style-type: none"> <li>• Rural</li> </ul>                                                                                    | Rural                                                                                                                                   |

|                                                                                                                                                                                                                                                                                                                                                       |                                   |
|-------------------------------------------------------------------------------------------------------------------------------------------------------------------------------------------------------------------------------------------------------------------------------------------------------------------------------------------------------|-----------------------------------|
| <ul style="list-style-type: none"> <li>• Urban</li> </ul>                                                                                                                                                                                                                                                                                             | Urban                             |
| <ul style="list-style-type: none"> <li>• No education</li> <li>• Primary education</li> <li>• Secondary education</li> </ul>                                                                                                                                                                                                                          | Low education                     |
| <ul style="list-style-type: none"> <li>• Professional training</li> <li>• University level</li> <li>• Postgraduate level</li> </ul>                                                                                                                                                                                                                   | High education                    |
| <ul style="list-style-type: none"> <li>• Smoker</li> </ul>                                                                                                                                                                                                                                                                                            | Smoker                            |
| <ul style="list-style-type: none"> <li>• Non – smoker</li> </ul>                                                                                                                                                                                                                                                                                      | Non – smoker                      |
| <ul style="list-style-type: none"> <li>• Not married</li> <li>• Single</li> </ul>                                                                                                                                                                                                                                                                     | Single                            |
| <ul style="list-style-type: none"> <li>• Married</li> <li>• Living with spouse</li> </ul>                                                                                                                                                                                                                                                             | Married                           |
| <ul style="list-style-type: none"> <li>• Lower income</li> </ul>                                                                                                                                                                                                                                                                                      | Lower income earner               |
| <ul style="list-style-type: none"> <li>• Higher income</li> </ul>                                                                                                                                                                                                                                                                                     | Higher income earner              |
| <ul style="list-style-type: none"> <li>• Medical students</li> <li>• Nurses</li> <li>• Midwife</li> <li>• Laboratory technicians</li> <li>• Medical doctors</li> <li>• Community health workers</li> </ul>                                                                                                                                            | Healthcare worker                 |
| <ul style="list-style-type: none"> <li>• No other vaccines</li> <li>• No Influenza vaccine</li> </ul>                                                                                                                                                                                                                                                 | No influenza/Other vaccines       |
| <ul style="list-style-type: none"> <li>• Christians</li> </ul>                                                                                                                                                                                                                                                                                        | Christians                        |
| <ul style="list-style-type: none"> <li>• Muslims</li> </ul>                                                                                                                                                                                                                                                                                           | Muslims                           |
| <ul style="list-style-type: none"> <li>• Black</li> </ul>                                                                                                                                                                                                                                                                                             | Black                             |
| <ul style="list-style-type: none"> <li>• White</li> </ul>                                                                                                                                                                                                                                                                                             | White                             |
| <ul style="list-style-type: none"> <li>• Chronic diseases</li> <li>• Poor health</li> <li>• Comorbidities</li> </ul>                                                                                                                                                                                                                                  | Comorbidities                     |
| <ul style="list-style-type: none"> <li>• Pregnancy</li> </ul>                                                                                                                                                                                                                                                                                         | Pregnancy                         |
| <ul style="list-style-type: none"> <li>• Breastfeeding</li> </ul>                                                                                                                                                                                                                                                                                     | Breastfeeding                     |
| <ul style="list-style-type: none"> <li>• adverse effect</li> <li>• side-effects</li> <li>• unsafe</li> <li>• safety</li> </ul>                                                                                                                                                                                                                        | Safety                            |
| <ul style="list-style-type: none"> <li>• Vaccines do not work</li> <li>• I will not get infected</li> <li>• Not concerned</li> <li>• COVID-19 is not dangerous</li> <li>• COVID-19 is Whiteman's disease</li> <li>• COVID-19 does not exist</li> <li>• Good health</li> <li>• Getting infected is better protection</li> <li>• Complacency</li> </ul> | Complacency                       |
| <ul style="list-style-type: none"> <li>• traditional herbs/alternative med</li> </ul>                                                                                                                                                                                                                                                                 | traditional herbs/alternative med |
| <ul style="list-style-type: none"> <li>• ineffective</li> </ul>                                                                                                                                                                                                                                                                                       | Ineffectiveness                   |

|                                                                                                                                                                                                                                    |                     |
|------------------------------------------------------------------------------------------------------------------------------------------------------------------------------------------------------------------------------------|---------------------|
| <ul style="list-style-type: none"> <li>• non-efficacious</li> </ul>                                                                                                                                                                |                     |
| <ul style="list-style-type: none"> <li>• Prior infection</li> </ul>                                                                                                                                                                | Prior infection     |
| <ul style="list-style-type: none"> <li>• mistrust vaccine</li> <li>• conspiracy</li> <li>• misinformation/social media</li> <li>• mistrust health system</li> <li>• mistrust manufacturer</li> <li>• mistrust scientist</li> </ul> | Mistrust vaccine    |
| <ul style="list-style-type: none"> <li>• misinformation</li> <li>• lack of information</li> <li>• social media</li> <li>• anti-vaxxers</li> </ul>                                                                                  | Lack of information |
| <ul style="list-style-type: none"> <li>• other vaccines</li> </ul>                                                                                                                                                                 | Other vaccines      |
| <ul style="list-style-type: none"> <li>• Mistrust ruling party</li> <li>• Mistrust gov't</li> <li>• Mistrust opposition party</li> </ul>                                                                                           | Political mistrust  |
